# Supplementary material for: Engineered Bacteriophages Containing Anti-CRISPR Suppress Infection of Antibiotic-Resistant P. aeruginosa
Source: PubMed Central journal article supplement (PMC9602763; doi:10.1128/spectrum.01602-22), 2022-08-16
Supplement: spectrum.01602-22-s0001.pdf [file spectrum.01602-22-s0001.pdf]

**Figure S1**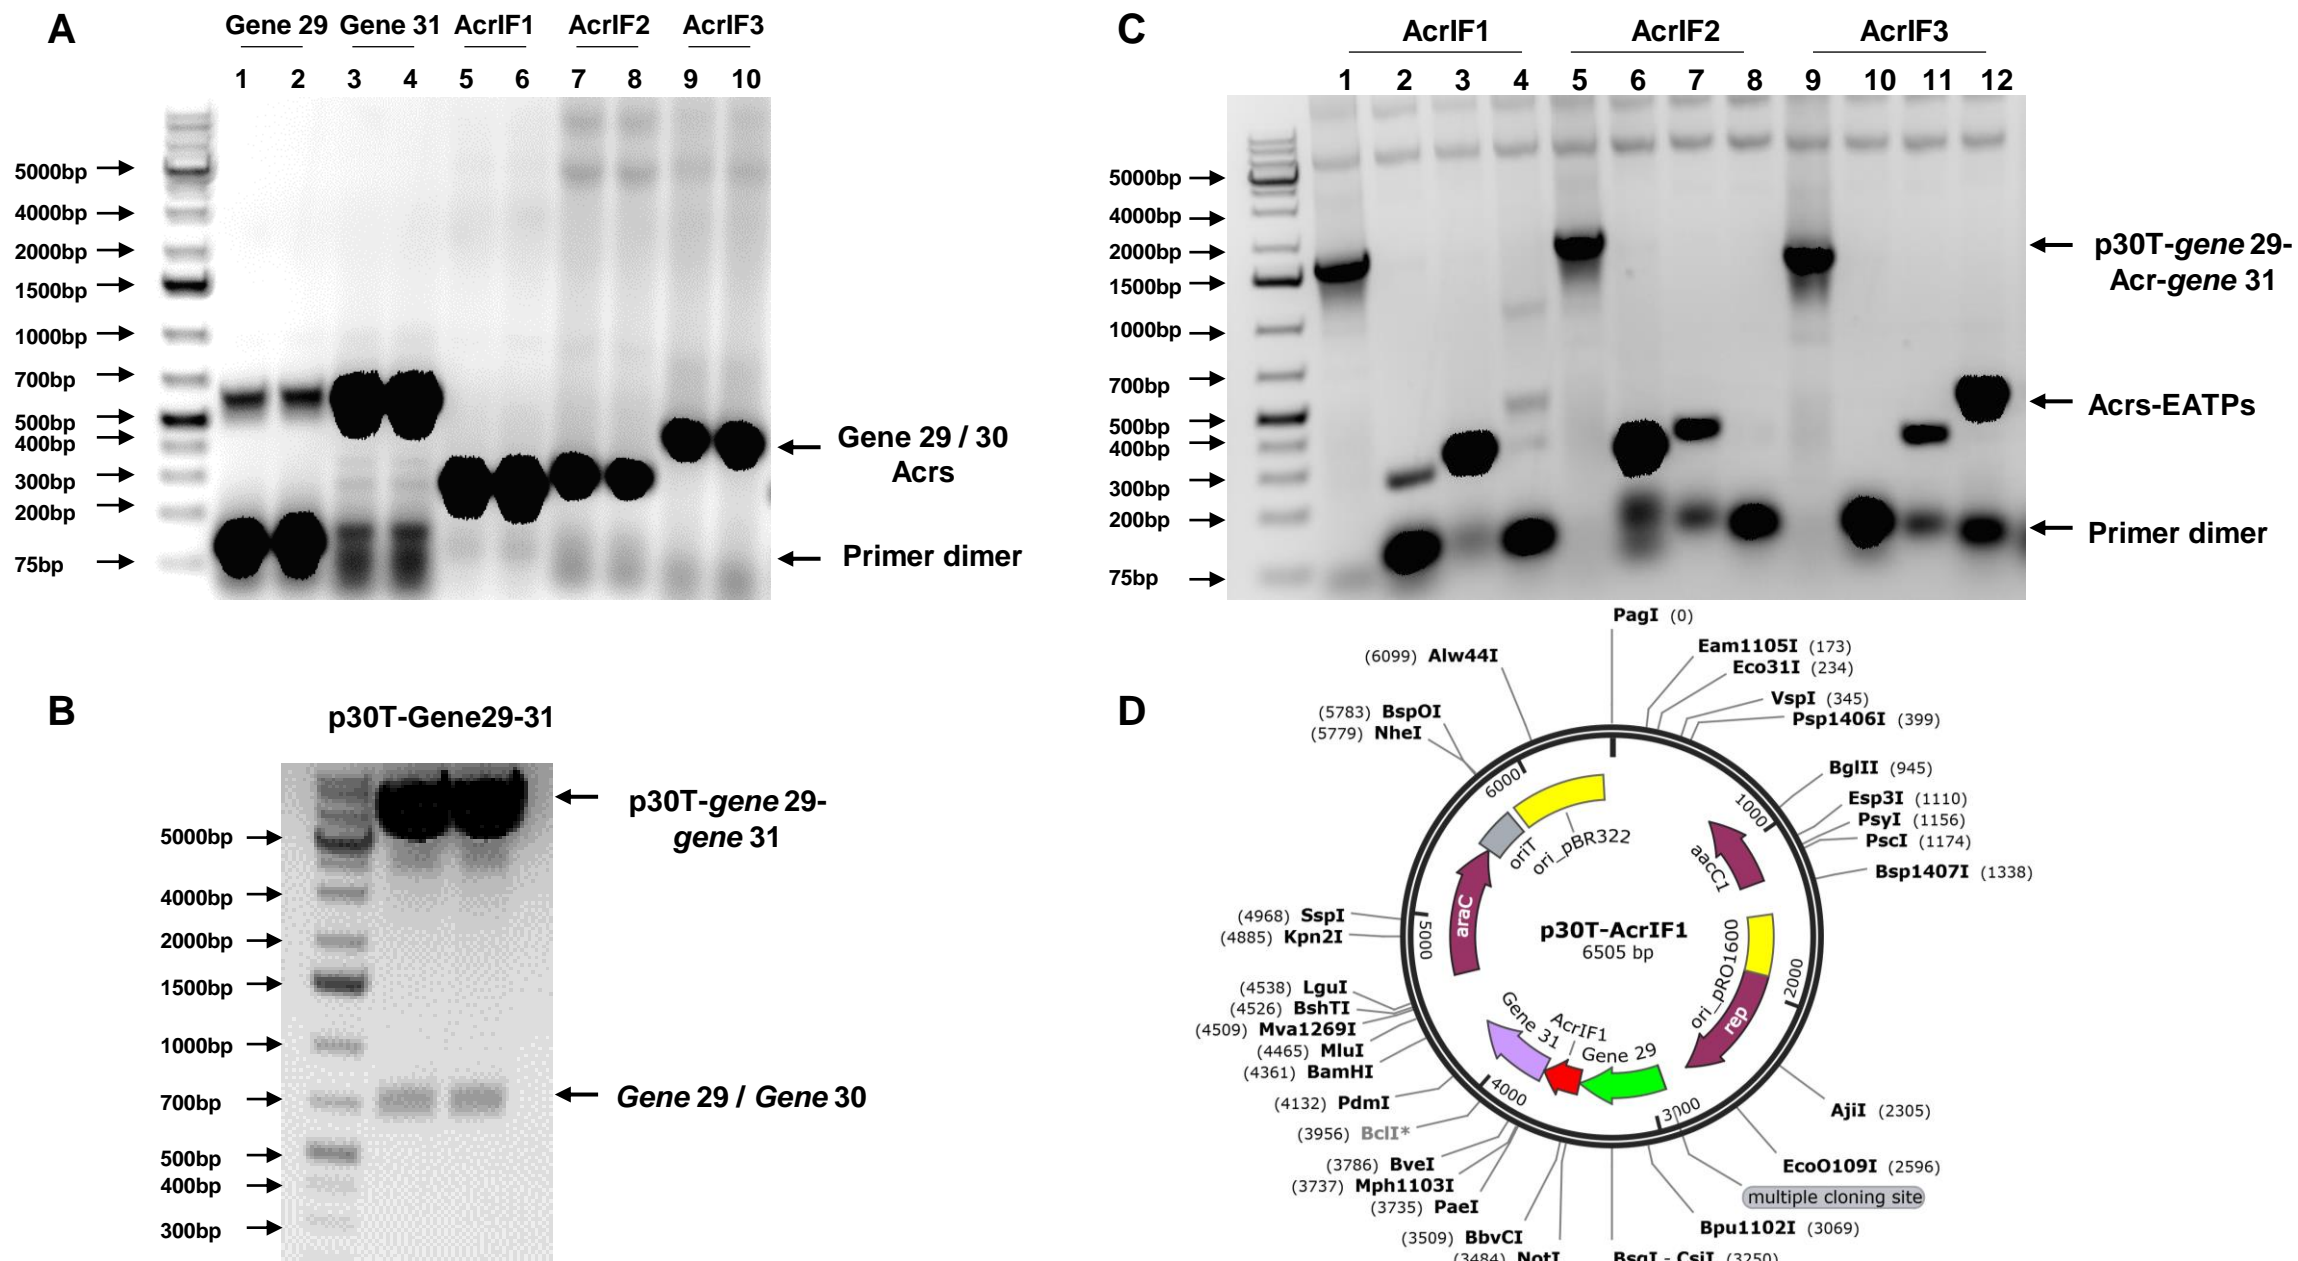



**Figure S2**

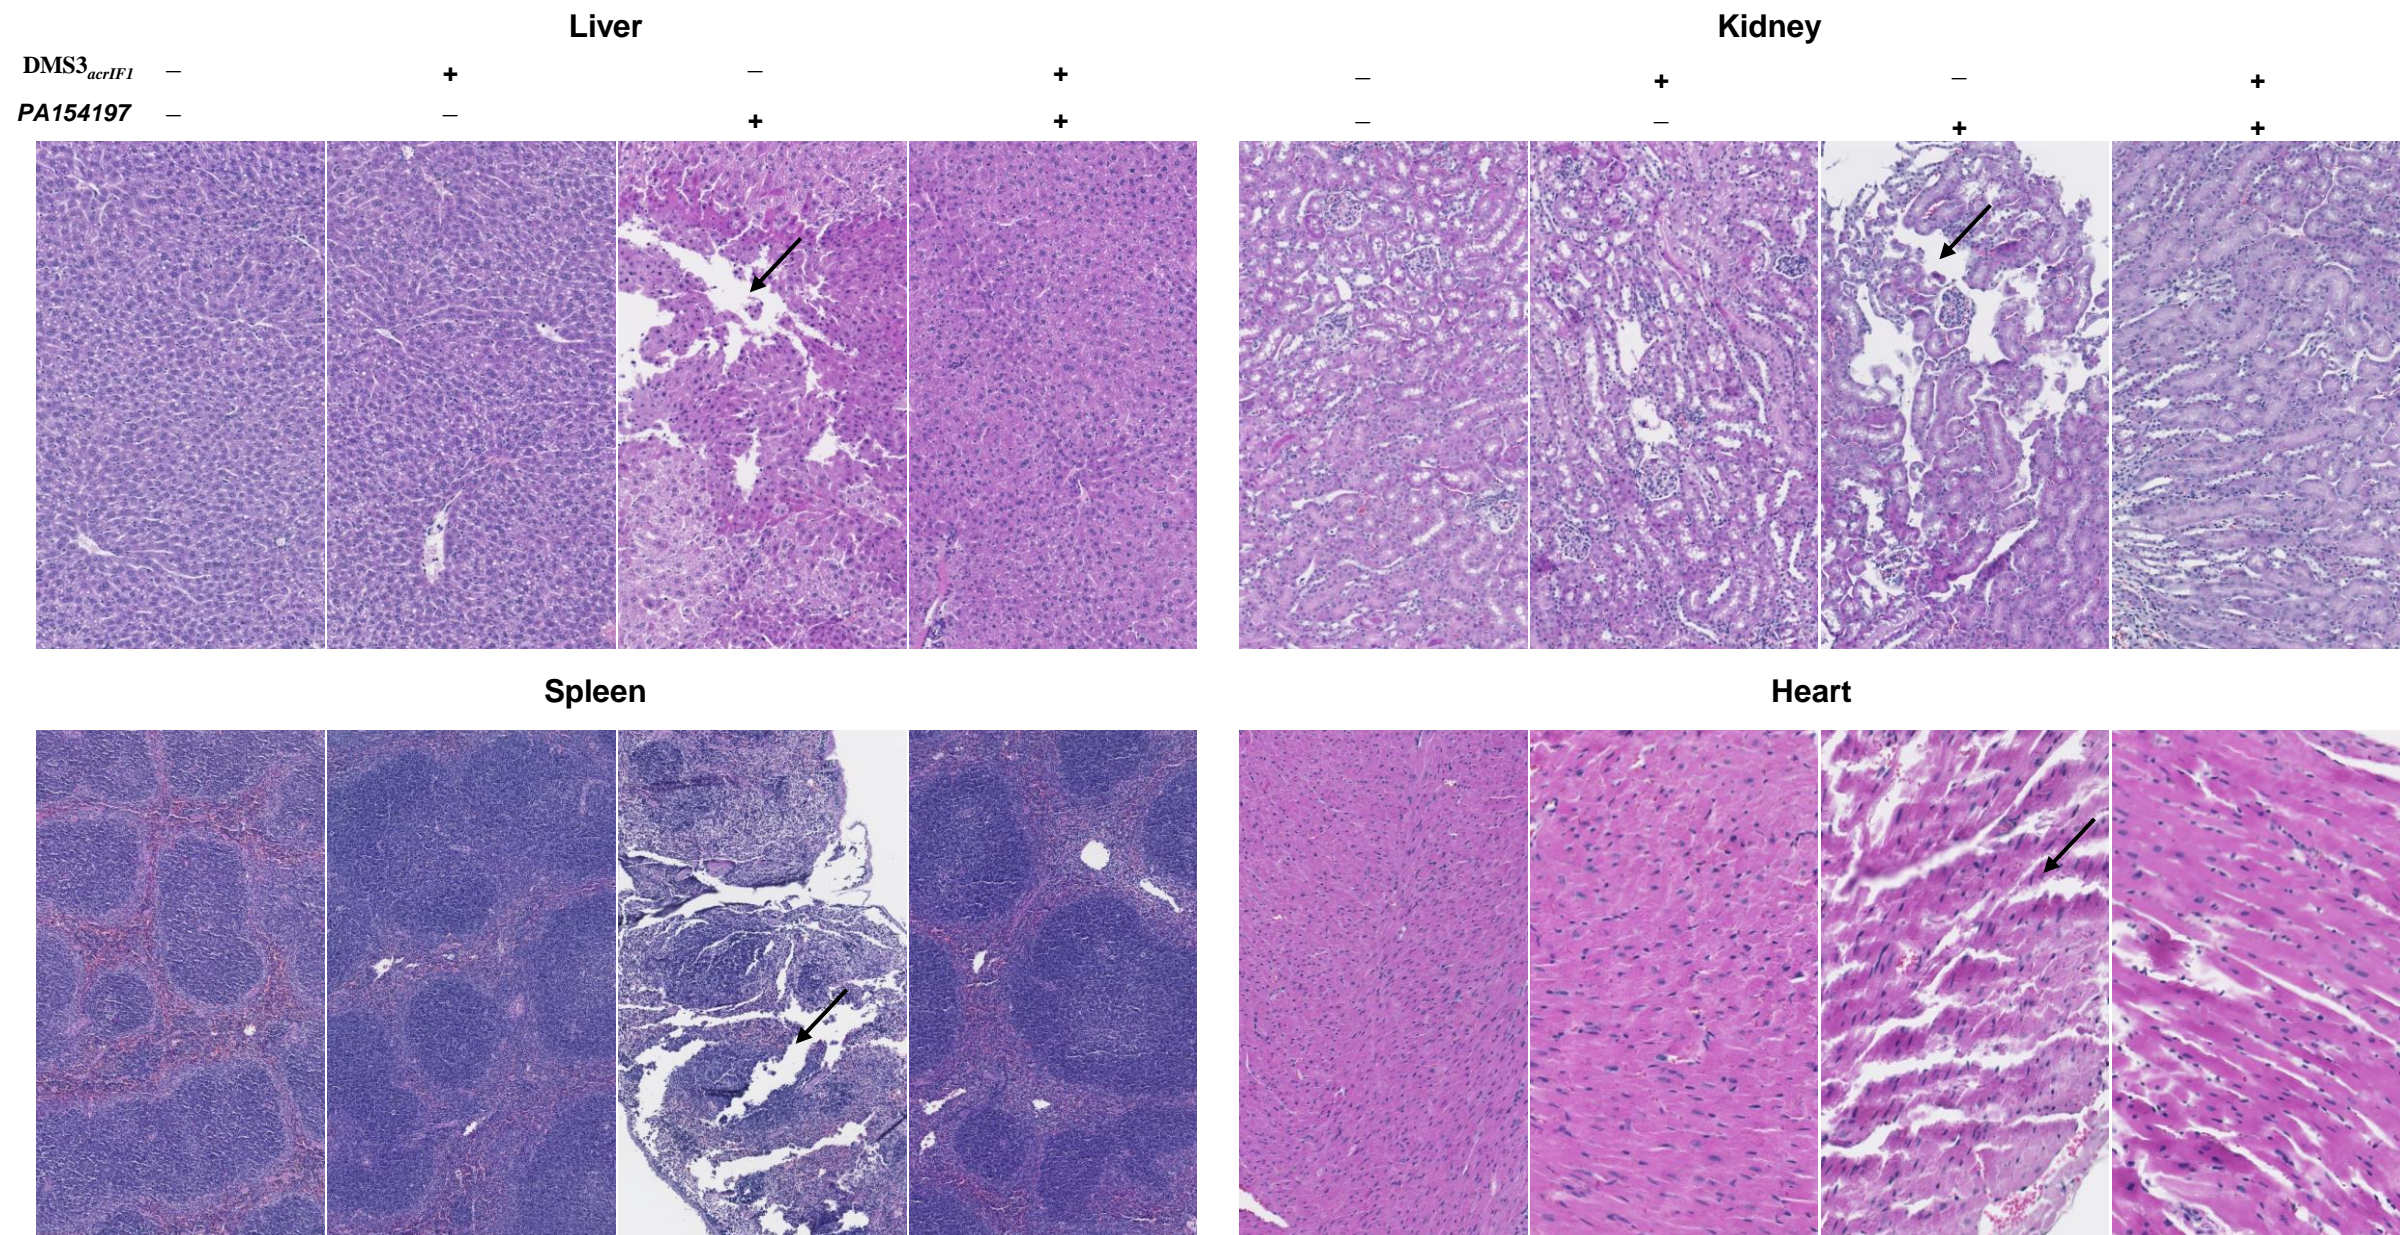

**Figure S2. DMS3<sub>macrIF1</sub> significantly improve tissue damage in mice by H&E staining.** C57BL/6N (n = 10) mice were anesthetized with ketamine (45 mg/kg) and intranasally instilled with  $6 \times 10^6$  CFU/25g clinically-isolated MDR *P. aeruginosa* PA154197 for 2 h, and intraperitoneally injected with  $1.2 \times 10^6$  PFU/mL DMS3<sub>macrIF1</sub> (MOI 0.2). The histological analysis was performed after completing the survival curve test at day 14. The cell rupture, inflammatory cell infiltration and tissue sclerosis were observed, and DMS3<sub>macrIF1</sub> treatment ameliorated tissues damage (magnified by 40 times) (Arrows represent typical tissue damage).



**Figure S3****A**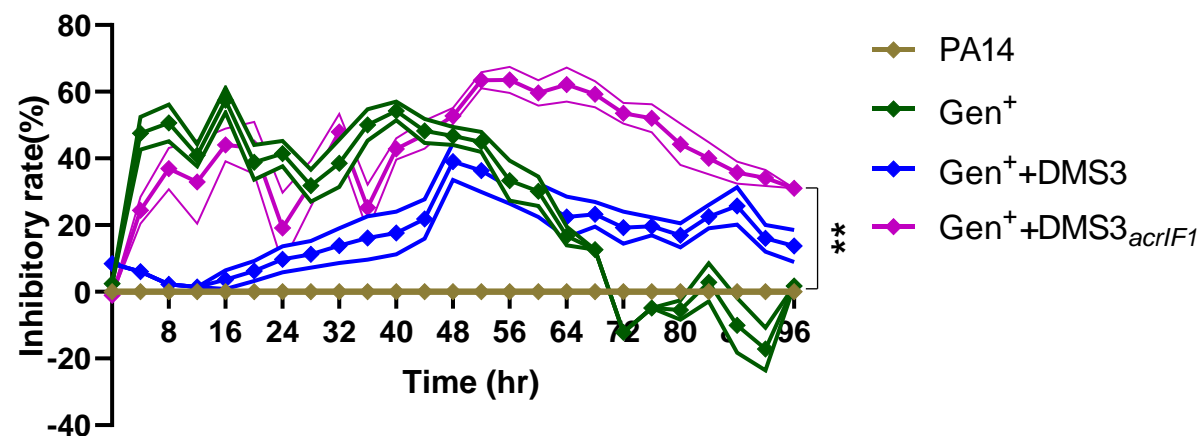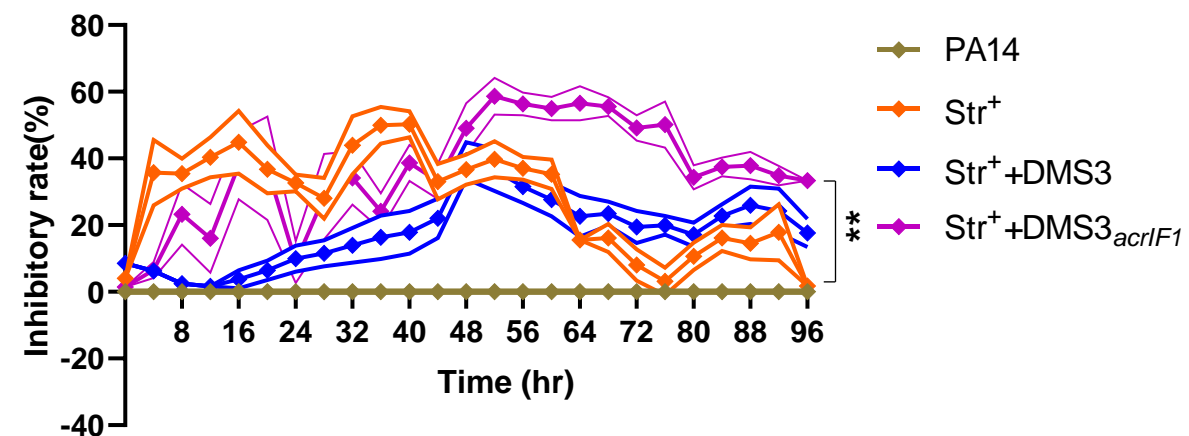**B**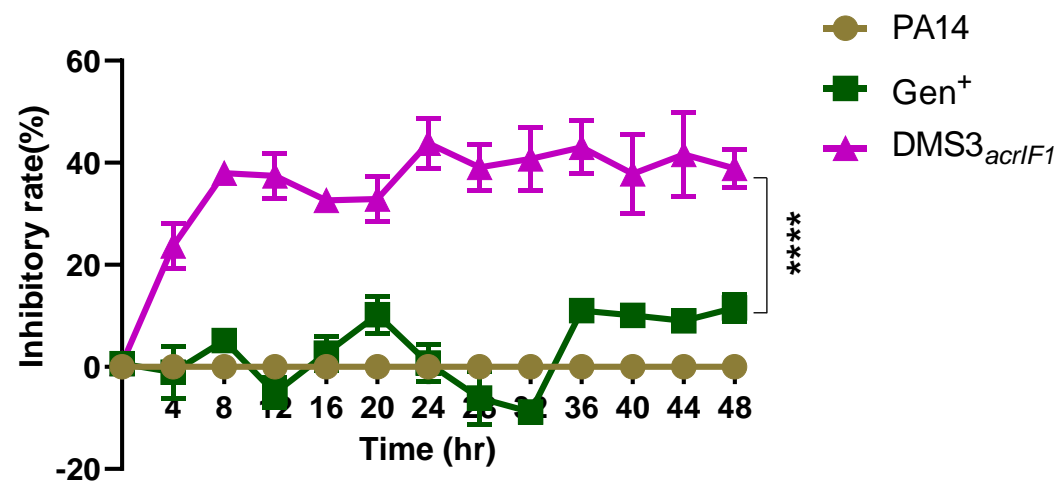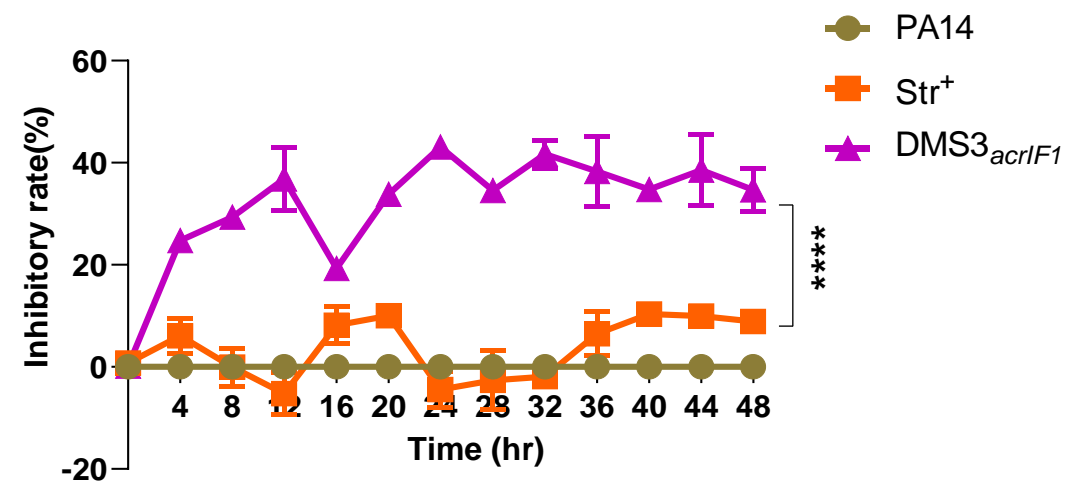

**Figure S3. DMS3<sub>macrIF1</sub> contribute to suppressing *P. aeruginosa* antibiotic resistance.** (A) PA14 (PA14:  $5 \times 10^8$  CFU/mL) was treated with gradient concentrations antibiotic (Gen<sup>+</sup> or Str<sup>+</sup>), gradient concentrations antibiotic and DMS3 (MOI 0.02) (Gen<sup>+</sup>/Str<sup>+</sup> + DMS3) or (Gen<sup>+</sup>/Str<sup>+</sup> + DMS3<sub>macrIF1</sub>). The inhibitory rate (%) of DMS3<sub>macrIF1</sub> on PA14 were measured. (B) PA14 acquired antibiotic resistance was picked out and grown to the mid-logarithmic phase (OD 600 = 0.4-0.6) in lysogeny broth (LB) at 37°C with 220-rpm shaking. The inhibitory rate (%) of DMS3<sub>macrIF1</sub> on PA14 were measured after treatment with DMS3<sub>macrIF1</sub> (MOI 0.2) or 100 µg/mL Gen<sup>+</sup> / Str<sup>+</sup> antibiotics. Data were presented as mean  $\pm$  standard error means (SEM) determined from biological triplicates, analyzed by one-way ANOVA compared with the control group (\* $p < 0.05$ , \*\* $p < 0.01$ , \*\*\* $p < 0.001$ , \*\*\*\* $p < 0.0001$ ).

**Supplementary Table S1**

| <b>No.</b> | <b>Origin</b>       | <b>CRISPR/Cas system</b> | <b>Strain ID</b> | <b>Antibiotic resistance</b> |
|------------|---------------------|--------------------------|------------------|------------------------------|
| 1          | Laboratory          | I-F                      | PA14             | Multidrug resistant          |
| 2          | Clinically isolated | I-F                      | PA154197         | Multidrug resistant          |
| 3          | Clinically isolated | I-F                      | PA150567         | --                           |
| 5          | Clinically isolated | I-F                      | PA150209         | <i>oprD</i> gene disrupted   |
| 6          | Clinically isolated | I-F&I-E                  | PA151345         | Multiple plasmids            |
| 7          | Clinically isolated | I-F&I-C                  | PA153837         | --                           |
| 8          | Clinically isolated | I-F                      | PA130788         | --                           |
| 9          | Clinically isolated | I-F                      | PA150577         | --                           |
| 10         | Clinically isolated | No                       | PA27853          | --                           |
| 11         | Clinically isolated | No                       | PA152165         | Multidrug resistant          |

**Supplementary Table S2**

| Gene           | Primer F (5'-3')                                                                                                                                                                                                                                                                                                                                                                                                                                                                                                                                                                                                     | Primer R (5'-3')                                                   | Application                 |
|----------------|----------------------------------------------------------------------------------------------------------------------------------------------------------------------------------------------------------------------------------------------------------------------------------------------------------------------------------------------------------------------------------------------------------------------------------------------------------------------------------------------------------------------------------------------------------------------------------------------------------------------|--------------------------------------------------------------------|-----------------------------|
| 1              | TAAGAAGGAGATATACATACGTGACAACCTAGGATCG<br>ACGTC                                                                                                                                                                                                                                                                                                                                                                                                                                                                                                                                                                       | GTTAGAGGCGTCAGGCTTCATGCATGCGCGGCGGC<br>CGCGTAAGGCTTCTATCCTTCTTGCGC | Amplification DMS3 Gene 29  |
| 2              | CGCCAAGAAGGATAGAAGCCTTACGCGGCCGC<br>CGCGCATGC ATGAAGCCTGACGCCTCTAAC                                                                                                                                                                                                                                                                                                                                                                                                                                                                                                                                                  | GTAAAACGACGGCCAGTGCCCTTGAATCCAGGCGC<br>TGCCA                       | Amplification DMS3 Gene 31  |
| 3              | TTACGCGGCCGC<br>ATGAAGTTCATCAAATACCTCAGCA                                                                                                                                                                                                                                                                                                                                                                                                                                                                                                                                                                            | CGCGCATGC TCAGGGGTTTTACGCCGGGAAATC                                 | Amplification & test AcrIF1 |
| 4              | TTACGCGGCCGC<br>ATGATCGCTCAGCAGCACAAAGATA                                                                                                                                                                                                                                                                                                                                                                                                                                                                                                                                                                            | CGCGCATGC TTAATCCTCCTCGACCGATTCA                                   | Amplification & test AcrIF2 |
| 5              | TTACGCGGCCGC ATGAGCAACACGATTTTCAGATCG                                                                                                                                                                                                                                                                                                                                                                                                                                                                                                                                                                                | CGCGCATGC TCATGCCTGTTCCCTCATACCG                                   | Amplification & test AcrIF3 |
| 6              | GCGTCACACTTTGCTATGCC                                                                                                                                                                                                                                                                                                                                                                                                                                                                                                                                                                                                 | CGTTGTAAAACGACGGCCAG                                               | Test Acrs in pHERK30T       |
| <b>Gene 29</b> | GTGACAACCTAGGATCGACGTGAGCTGGACGACCCAGGAGGTTTCGCCAGCGCCTGGCGCTGCTGATGCGCTCGGTGACCGATACGCTGCCGGTCATGCGTGGCATCGCTG<br>CCGAGCTGCTCGCGGAACTGAGTTTCGCTTTATGACGAGGGGCGGGCTGGCCGCAGCTCAGCCCCGTGACTGTGCGCGCTCGCGAGGCTAAGGGGCGTGGTCCAC<br>ACCCGATCCTCCAGGTCACAAACGCCCTGGCTCGCTCGGTACGACCTGGGCGGATCGCAACGAGGCGGGAATCGGGTCCAATTTGGTCTATGCGGCCATCCACCAATTT<br>GGTGGCGACGCCGGCCGGGGTCAACAGGTCGAAATTCCTGCACGGCGGTATCTGCCTTTTCGACGAAAACGGCCAATGGCGGCCGCGCTCGGCAGTCAATTCTGGAGA<br>TCGTCCTAACAGCCTTGAGCCGAAATCGGTAGTGGCCACTTTTCGGACAAGCGGCACATTGTGCCTATTGCGAATTAGGCACAATGTGCCTAATCTAACGTCATGCCAGCCA<br>CAACGGCGAGGCGCCAAGAAGGATAGAAGCC |                                                                    |                             |
| <b>Gene 31</b> | ATGAAGCCTGACGCCTTAACCACAACCCAGACCCGCGCTACCTGCGCGGGCTGCTCAAGAAAGCCGGCATCAGCCAGCGGCGCGCAGCCGAGCTGCTCGGCCTCAGTG<br>ACAGGGTGATGCGCTATTACCTGAGCGAGGACATCAAGGAGGGCTACCGCCCCGCGCCGTATACCGTCCAGTTCGCCCTGGAGTGCTGGCGAACGACCCGCCATCTGC<br>GTGATCACCTGATCCGCCCCGAAACGCGCTACACGCGCCGAAACGGGGTTAGACGCTACCTCGCTCAGAGTCCGGTGCCTTAACCCCGTTAGAGCCCCGTTAGAAATCGCT<br>CCAGCGCCATTCTTGCCAGGGTTTGGCCAGAAGATGGCGCCGGACGGTTTCCGCGAGTCGTTGAACCCCTTCATGTGACCGCTGCTTTCTACCGTCGCCACCATTGGCG<br>GCATGGAAAAGAACCGCCTACTCGTTGCCATCGCCGCCTGCTCGTTCCAGCTTCCCAGCTGGAGGATGGCAGCGCCTGGATTCAAG                                                           |                                                                    |                             |
| <b>AcrIF1</b>  | AtgAAGTTCATCAAATACCTCAGCACCGCTCACCTGAACTATATGAATATCGCCGTTTACGAAAATGGCAGCAAAATCAAAGCCCGCGTTGAGAACGTCGTAAACGGCAAAG<br>CGTTGGTGCTCGTGATTTTACTCAACGGAGCAACTGGAATCCTGGTTTTATGGTCTGCCTGGCAGTGGCCTCGGTCGTATTGAAAACGCTATGAATGAGATTTCCCGCGT<br>GAAAACCCCTGA                                                                                                                                                                                                                                                                                                                                                                   |                                                                    |                             |
| <b>AcrIF2</b>  | AtgATCGCTCAGCAGCACAAAGATACTGTCGACGCTGCGAAGCCGCGAAGCCATCGCTATCGCTAAAGATCAGGTATGGGATGGCGAGGGCTATACCAAGTACACGTTT<br>GACGACAACAGCGTCTGATCCAGTCGGGCACTACTCAGTATGCGATGGATGCCGACGACGCAGACAGCATCAAAGGCTATGCGGACTGGCTGGACGATGAGGCTCGCTC<br>CGCCGAAGCGTCGGAGATCGAGCGCCTGCTTGAATCGGTCGAGGAGGAGTAA                                                                                                                                                                                                                                                                                                                               |                                                                    |                             |
| <b>AcrIF3</b>  | AtgAGCAACACCATTAGCGATCGTATTGTGGCGCGTAGCGTGATTGAAGCGGCGCGTTTTTATTCAGAGCTGGGAAGATGCGGATCCGGATAGCCTGACCGAAGATCAGGTG<br>CTGGCGGCGGGCGGGCTTTGCGGCGCGTCTGCATGAAGGCCTGCAGGCGACCGTGCTGCAGCGTCTGGTGGATGAAAGCAACCATGAAGAATATCGTGAATTTAAAGCGT<br>GGGAAGAAGCGCTGCTGAACGCGGATGGCCGTGTGGCGAGCAGCCGTTTTCGGATTGGGGCTGGTGGTATCGTATTGCGAACGTGatgCTGGCGACCGCGAGCCAGAAC<br>GTGGGCGTGACCTGGGGCAGCCGTGTGCATGGCCGTCTGatgGCGATTTTTTCAGGATAAATTTAAACAGCGTTATGAAGAACAGGCG                                                                                                                                                                      |                                                                    |                             |
